# Supplementary material for: Impact of Mycobacterium tuberculosis Infection on Human B Cell Compartment and Antibody Responses
Source: MDPI journal article supplement (doi:10.3390/cells11182906), 2022-09-17
Supplement: s1 [file s1]

**Supplemental Table S1.** List of genes in database (accession number: GSE54992).

|                                               | <i>SYMBOL</i> | <i>RANK IN GENE LIST</i> | <i>RANK METRIC SCORE</i> | <i>RUNNING ES</i> | <i>CORE ENRICHMENT</i> |
|-----------------------------------------------|---------------|--------------------------|--------------------------|-------------------|------------------------|
| <i>B cell differentiation</i><br>(GO:0030183) | IL10          | 96                       | 0.758                    | 0.0341            | Yes                    |
|                                               | IFNA4         | 179                      | 0.631                    | 0.0624            | Yes                    |
|                                               | C17orf99      | 181                      | 0.63                     | 0.0952            | Yes                    |
|                                               | ADGRG3        | 319                      | 0.518                    | 0.1145            | Yes                    |
|                                               | PAX5          | 328                      | 0.512                    | 0.1408            | Yes                    |
|                                               | DRD2          | 466                      | 0.459                    | 0.157             | Yes                    |
|                                               | IL11          | 629                      | 0.412                    | 0.1693            | Yes                    |
|                                               | FZD9          | 647                      | 0.407                    | 0.1896            | Yes                    |
|                                               | JAK3          | 928                      | 0.346                    | 0.1917            | Yes                    |
|                                               | SP3           | 960                      | 0.34                     | 0.2077            | Yes                    |
|                                               | IFNA7         | 1054                     | 0.324                    | 0.2193            | Yes                    |
|                                               | BCL6          | 1485                     | 0.272                    | 0.2091            | Yes                    |
|                                               | IFNW1         | 1559                     | 0.264                    | 0.2187            | Yes                    |
|                                               | IFNA6         | 1726                     | 0.248                    | 0.2222            | Yes                    |
|                                               | TNFSF13B      | 2114                     | 0.217                    | 0.2116            | Yes                    |
|                                               | NOTCH2        | 2132                     | 0.216                    | 0.2219            | Yes                    |
|                                               | NFAM1         | 2223                     | 0.209                    | 0.2277            | Yes                    |
|                                               | CDH17         | 2643                     | 0.182                    | 0.2134            | Yes                    |
|                                               | FLT3          | 2690                     | 0.18                     | 0.2202            | Yes                    |
|                                               | SLAMF8        | 2743                     | 0.177                    | 0.2265            | Yes                    |
|                                               | IL4           | 2942                     | 0.167                    | 0.224             | Yes                    |
|                                               | IFNA21        | 3051                     | 0.162                    | 0.2263            | Yes                    |
|                                               | PIK3R2        | 3120                     | 0.16                     | 0.2308            | Yes                    |
| <i>B cell activation</i><br>(GO:0042113)      | BANK1         | 15023                    | -0.152                   | -0.2717           | No                     |
|                                               | ITFG2         | 15255                    | -0.165                   | -0.2789           | Yes                    |
|                                               | RAG1          | 15324                    | -0.169                   | -0.2767           | Yes                    |
|                                               | ITGA4         | 15400                    | -0.174                   | -0.2747           | Yes                    |
|                                               | MSH2          | 15472                    | -0.18                    | -0.2723           | Yes                    |
|                                               | NTRK1         | 15580                    | -0.187                   | -0.2716           | Yes                    |
|                                               | CR2           | 15705                    | -0.198                   | -0.2715           | Yes                    |
|                                               | CASP8         | 15709                    | -0.198                   | -0.2646           | Yes                    |
|                                               | LAX1          | 15777                    | -0.204                   | -0.261            | Yes                    |
|                                               | ZAP70         | 15791                    | -0.205                   | -0.2544           | Yes                    |
|                                               | NKX2-3        | 15820                    | -0.208                   | -0.2485           | Yes                    |
|                                               | CD79A         | 15863                    | -0.212                   | -0.2432           | Yes                    |
|                                               | LEF1          | 15900                    | -0.215                   | -0.2375           | Yes                    |
|                                               | IL7           | 16286                    | -0.258                   | -0.2501           | Yes                    |
|                                               | CD180         | 16341                    | -0.264                   | -0.2437           | Yes                    |
|                                               | RASGRP1       | 16382                    | -0.27                    | -0.2362           | Yes                    |
|                                               | RAG2          | 16408                    | -0.273                   | -0.2278           | Yes                    |

|                                                 |  |          |       |        |         |     |
|-------------------------------------------------|--|----------|-------|--------|---------|-----|
|                                                 |  | FCRL1    | 16444 | -0.279 | -0.2197 | Yes |
|                                                 |  | CD19     | 16459 | -0.281 | -0.2104 | Yes |
|                                                 |  | TPD52    | 16528 | -0.291 | -0.2038 | Yes |
|                                                 |  | IFNA2    | 16548 | -0.294 | -0.1943 | Yes |
|                                                 |  | MS4A1    | 16564 | -0.296 | -0.1845 | Yes |
|                                                 |  | PIK3R1   | 16605 | -0.302 | -0.1759 | Yes |
|                                                 |  | CXCR5    | 16650 | -0.31  | -0.1672 | Yes |
|                                                 |  | CNOT6    | 16661 | -0.312 | -0.1565 | Yes |
|                                                 |  | IRF8     | 16663 | -0.312 | -0.1453 | Yes |
|                                                 |  | HDAC9    | 16987 | -0.381 | -0.15   | Yes |
|                                                 |  | IL6      | 17059 | -0.401 | -0.1396 | Yes |
|                                                 |  | SASH3    | 17099 | -0.414 | -0.1269 | Yes |
|                                                 |  | DRD3     | 17143 | -0.427 | -0.114  | Yes |
|                                                 |  | CCR6     | 17361 | -0.521 | -0.1075 | Yes |
|                                                 |  | CHRNA2   | 17471 | -0.606 | -0.0919 | Yes |
|                                                 |  | IL7R     | 17482 | -0.614 | -0.0703 | Yes |
|                                                 |  | ATAD5    | 17592 | -0.74  | -0.0499 | Yes |
|                                                 |  | RABL3    | 17612 | -0.779 | -0.0229 | Yes |
|                                                 |  | IKZF3    | 17651 | -0.848 | 0.0055  | Yes |
| <i>B cell mediated immunity</i><br>(GO:0019724) |  | C1QB     | 280   | 0.545  | 0.0272  | Yes |
|                                                 |  | SERPING1 | 345   | 0.506  | 0.0636  | Yes |
|                                                 |  | CD70     | 431   | 0.47   | 0.0959  | Yes |
|                                                 |  | DRD2     | 466   | 0.459  | 0.1302  | Yes |
|                                                 |  | C3       | 922   | 0.347  | 0.1318  | Yes |
|                                                 |  | C1S      | 957   | 0.34   | 0.1568  | Yes |
|                                                 |  | C1QA     | 1138  | 0.312  | 0.1713  | Yes |
|                                                 |  | FCGR1A   | 1148  | 0.311  | 0.1954  | Yes |
|                                                 |  | C2       | 1173  | 0.308  | 0.2183  | Yes |
|                                                 |  | EXO1     | 1265  | 0.297  | 0.2367  | Yes |
|                                                 |  | BCL6     | 1485  | 0.272  | 0.2457  | Yes |
|                                                 |  | C4A      | 1632  | 0.257  | 0.2578  | Yes |
| <i>B cell homeostasis</i><br>(GO:0001782)       |  | CAMLG    | 117   | 0.731  | 0.1286  | Yes |
|                                                 |  | DRD2     | 466   | 0.459  | 0.1938  | Yes |
|                                                 |  | BCL2L11  | 812   | 0.368  | 0.2424  | Yes |
|                                                 |  | SPNS2    | 1233  | 0.301  | 0.2743  | Yes |
|                                                 |  | TNFAIP3  | 1734  | 0.247  | 0.2917  | Yes |
|                                                 |  | TNFSF13B | 2114  | 0.217  | 0.3104  | Yes |
|                                                 |  | SOS1     | 2504  | 0.19   | 0.3235  | Yes |
